# Supplementary material for: A Systematic Scoping Review on Migrant Health Coverage in Thailand
Source: MDPI journal article supplement (doi:10.3390/tropicalmed7080166), 2022-08-03
Supplement: s1 [file s1]

(migrant\* OR migrat\* OR asylum\* OR refugee\* OR transient\* OR immigrant\* OR immigrat\* OR emigrant\* OR emigrat\* OR foreign\* OR alien\* OR non-citizen\* OR noncitizen\* OR non-national\* OR "non national\*" OR non-resident\* OR "non resident\*" OR squatter\* OR "cross-border population\*" OR "mobile population\*" OR ((seasonal OR temporary OR irregular OR illegal OR undocumented OR guest) AND worker\*) OR stateless OR state-less OR nomad OR gypsy OR gypsies OR citizenship OR displaced OR trafficking OR "unaccompanied minor\*" OR "temporary resident\*" OR "long-term resident\*" OR "cultural minorit\*" OR "ethnic minorit\*" OR "visa overstayer\*" OR "recent entrant\*" OR "new entrant\*" OR "returned national\*" OR outsider\* OR "enslaved person\*" OR slave\* OR "indefinite resident\*" OR "Transients and Migrants" [mesh] OR Refugees [mesh] OR "Emigrants and Immigrants" [mesh] OR "Human Trafficking" [mesh] OR "Enslaved Persons" [mesh]) AND (((("Health care" OR Healthcare OR health-care OR "medical care" OR "medical service\*" OR "health service\*" OR insurance\* OR "care service\*") AND (utilization OR utilisation OR delivery OR access\* OR coverage OR accept\* OR uptake OR availab\* OR affordab\* OR provision\* OR challenge\* OR barrier\*)) OR "health system response\*" OR "health coverage\*" OR "health insurance\*" OR "health need\*" OR "health equity" OR "delivery of health care" [Mesh] OR "Patient Acceptance of Health Care"[Mesh] OR "Insurance coverage"[Mesh] OR "Insurance, Health" [mesh]) AND ("South East\* Asia\*" OR "Southeast\* Asia\*" OR "South-east\* Asia\*" OR Mekong\* OR ASEAN OR "Association of Southeast Asian Nations" OR Thai\* OR Myanmar\* OR Burm\* OR Brunei\* OR Indonesia\* OR Singapore\* OR Vietnam\* OR "Viet Nam\*" OR Cambodia\* OR Laos\* OR "Lao people's democratic republic\*" OR Laotian\* OR Lao OR "East Timor\*" OR Timor-Leste\* OR Malay\* OR Philippin\* OR filipin\* OR Yunnan\* OR "Guangxi Zhuang\*" OR "Southeast Asia" [Mesh])
