# Supplementary material for: A Systematic Scoping Review on Migrant Health Coverage in Thailand
Source: MDPI journal article supplement (doi:10.3390/tropicalmed7080166), 2022-08-03
Supplement: s1 [file s1]

| POPULATION                                                                                                                                                                    | CONTEXT                                                                                                                                                                         | CONCEPT                                                                                                                                                                                                                    |
|-------------------------------------------------------------------------------------------------------------------------------------------------------------------------------|---------------------------------------------------------------------------------------------------------------------------------------------------------------------------------|----------------------------------------------------------------------------------------------------------------------------------------------------------------------------------------------------------------------------|
| Migrants, particularly including labour migrants, migrant women, migrant children, seasonal migrants, victims of trafficking, refugees, asylum-seekers and stateless migrants | Thailand, Brunei, Burma/Myanmar, Cambodia, Timor-Leste, Indonesia, Laos, Malaysia, the Philippines, Singapore, and Vietnam, Southeast Asia, Greater Mekong Subregion, Indochina | Availability, accessibility, acceptability, utilization, coverage, uptake, affordability, delivery, provision of health care/ medical care, health services, health insurance, health system responsiveness, health equity |
