# Supplementary material for: A Systematic Scoping Review on Migrant Health Coverage in Thailand
Source: MDPI journal article supplement (doi:10.3390/tropicalmed7080166), 2022-08-03
Supplement: s1 [file s1]

| <b>DATA ITEM</b>           | <b>DESCRIPTION</b>                                                                             |
|----------------------------|------------------------------------------------------------------------------------------------|
| health coverage dimension  | Dimension from the Tanahashi health coverage model                                             |
| year of publication        | Year in which the paper was published                                                          |
| type of migrant population | Typology of migrant population according to definition or clarification in paper               |
| health domain              | Different areas of health and disease according to medical practice, which partly overlap      |
| scope of health coverage   | Fields or types of health care services                                                        |
| methods broad              | Broad distinction of research approach according to qualitative, quantitative or a mix of both |
| study design               | framework or the set of methods and procedures used to collect and analyse data                |
| methods detailed           | principles and procedures used for data generation                                             |
| perspectives represented   | Perspectives represented as sources of data analysed in the study                              |
