# Supplementary material for: A Systematic Scoping Review on Migrant Health Coverage in Thailand
Source: MDPI journal article supplement (doi:10.3390/tropicalmed7080166), 2022-08-03
Supplement: s1 [file s1]

| REFERENCE            | HEALTH COVERAGE DIMENSION                        | YEAR OF PUBLIC ATION | TYPE OF MIGRANT POPULATION | HEALTH DOMAIN                                | SCOPE OF HEALTH COVERAGE           | METHODS BROAD | STUDY DESIGN                | METHODS DETAILED                                     | PERSPECTIVE REPRESENTED                | N                                                                  |
|----------------------|--------------------------------------------------|----------------------|----------------------------|----------------------------------------------|------------------------------------|---------------|-----------------------------|------------------------------------------------------|----------------------------------------|--------------------------------------------------------------------|
| Phanwichatkul et al. | acceptability                                    | 2021                 | migrant women              | reproductive and maternal health             | access to specific health services | qualitative   | ethnographic                | in-depth interviews and observation                  | migrants and key informants            | 13 migrant women and 10 key informants                             |
| Aung and Panza       | accessibility and acceptability                  | 2014                 | migrants                   | TB (infectious diseases)                     | access to specific health services | quantitative  | descriptive cross-sectional | survey                                               | migrants                               | 392                                                                |
| Steinbrook et al.    | accessibility                                    | 2021                 | migrant women              | reproductive and maternal health             | access to specific health services | quantitative  | secondary data analysis     | health information system                            | health information system              | 11624                                                              |
| Yimyam               | acceptability                                    | 2014                 | migrant worker women       | reproductive and maternal health and general | access to specific health services | mixed methods | mixed methods               | survey and FGDs                                      | migrants and key informants            | 314 survey + 20 in-depth interviews + 12 KIs + 48 FGD participants |
| Kosiyaporn et al.    | availability and accessibility and acceptability | 2018                 | migrant children           | immunization (Infectious diseases)           | preventative health care           | mixed methods | mixed methods               | qualitative interviews and health information system | migrants and health information system |                                                                    |
| Traisuwan            | accessibility and acceptability                  | 2021                 | migrant worker women       | dental health                                | access to specific                 | quantitative  | analytical cross-sectional  | questionnaire                                        | migrants                               | 418                                                                |

| REFERENCE                  | HEALTH COVERAGE DIMENSION                        | YEAR OF PUBLIC ACTION | TYPE OF MIGRANT POPULATION        | HEALTH DOMAIN                      | SCOPE OF HEALTH COVERAGE           | METHODS BROAD | STUDY DESIGN                | METHODS DETAILED                                                                  | PERSPECTIVE REPRESENTED     | N     |
|----------------------------|--------------------------------------------------|-----------------------|-----------------------------------|------------------------------------|------------------------------------|---------------|-----------------------------|-----------------------------------------------------------------------------------|-----------------------------|-------|
|                            |                                                  |                       |                                   |                                    | health services                    |               |                             |                                                                                   |                             |       |
| Vittaporn and Boonmongk on | availability and accessibility and acceptability | 2016                  | migrant workers                   | TB (Infectious diseases)           | access to specific health services | qualitative   | ethnographic                | observation, in-depth interviews, field notes, and formal and informal interviews | migrants and key informants | 43    |
| Aiko et al.                | accessibility                                    | 2016                  | migrant children                  | immunization (Infectious diseases) | preventative health care           | quantitative  | longitudinal descriptive    | health information system                                                         | health information system   | 12277 |
| Xu et al.                  | accessibility and acceptability                  | 2021                  | migrant workers                   | NCDs (thalassemia)                 | preventative health care           | quantitative  | analytical cross-sectional  | survey                                                                            | migrants                    | 492   |
| Phaiyaron et al.           | accessibility and acceptability                  | 2021                  | urban refugees and asylum-seekers | NCDs                               | access to specific health services | quantitative  | analytical cross-sectional  | questionnaire                                                                     | migrants                    | 181   |
| Kunpeuk et al.             | accessibility and acceptability                  | 2021                  | urban refugees and asylum-seekers | general                            | access to health care in general   | quantitative  | descriptive cross-sectional | survey                                                                            | migrants                    | 181   |
| Pyae Phy Kyaw and Geater   | accessibility                                    | 2021                  | migrant workers (seafarers)       | general                            | access to health care in general   | quantitative  | descriptive cross-sectional | questionnaire                                                                     | migrants                    | 385   |
| Srisai et al.              | accessibility                                    | 2020                  | migrant workers                   | general                            | health insurance                   | qualitative   | case study                  | in-depth interviews                                                               | migrants and key informants | 14    |
| Kosiyaporn et al.          | availability and accessibility and acceptability | 2020                  | migrant workers                   | general                            | access to health care in general   | qualitative   | system analysis             | In-depth interviews                                                               | key informants              | 50    |

| REFERENCE                     | HEALTH COVERAGE DIMENSION                        | YEAR OF PUBLICATION | TYPE OF MIGRANT POPULATION | HEALTH DOMAIN                      | SCOPE OF HEALTH COVERAGE                                      | METHODS BROAD | STUDY DESIGN                      | METHODS DETAILED          | PERSPECTIVE REPRESENTED     | N                                   |
|-------------------------------|--------------------------------------------------|---------------------|----------------------------|------------------------------------|---------------------------------------------------------------|---------------|-----------------------------------|---------------------------|-----------------------------|-------------------------------------|
| Thein and Thepthien           | accessibility                                    | 2020                | migrant women              | reproductive and maternal health   | preventative health care                                      | quantitative  | descriptive cross-sectional       | survey                    | migrants                    | 360                                 |
| Srivojana et al.              | accessibility                                    | 2014                | migrant workers            | general and occupational health    | access to health care in general and preventative health care | qualitative   | case study                        | in-depths interviews      | key informants              | 60                                  |
| Suphanchai et al. (a)         | accessibility                                    | 2019                | migrant workers            | general                            | access to health care in general and health insurance         | quantitative  | secondary data analysis           | health information system | health information system   | 1733 uninsured and 2122 insured     |
| Prakunwisit and Areesantichai | accessibility                                    | 2015                | migrant children           | immunization (Infectious diseases) | preventative health care                                      | quantitative  | descriptive cross-sectional study | structured questionnaire  | migrants                    | 386                                 |
| Chatchawan chanchanakij       | availability and accessibility and acceptability | 2007                | migrant workers            | general                            | access to health care in general                              | quantitative  | descriptive cross-sectional study | questionnaire             | migrants                    | 300                                 |
| Saether et al.                | accessibility                                    | 2007                | migrant workers            | HIV/AIDS (Infectious diseases)     | access to specific health services                            | qualitative   | descriptive qualitative           | FGDs and interviews       | migrants and key informants | 6 FGDs with 74 migrants and 13 KIIs |
| Arnott et al.                 | availability and accessibility and acceptability | 2017                | migrant women              | reproductive and maternal health   | access to specific health services                            | qualitative   | descriptive qualitative           | in-depth interviews       | migrants                    | 14                                  |

| REFERENCE          | HEALTH COVERAGE DIMENSION               | YEAR OF PUBLIC ATION | TYPE OF MIGRANT POPULATION  | HEALTH DOMAIN                    | SCOPE OF HEALTH COVERAGE                              | METHODS BROAD | STUDY DESIGN                      | METHODS DETAILED                                      | PERSPECTIVE REPRESENTED                        | N        |
|--------------------|-----------------------------------------|----------------------|-----------------------------|----------------------------------|-------------------------------------------------------|---------------|-----------------------------------|-------------------------------------------------------|------------------------------------------------|----------|
| Myo-Lin-Zaw et al. | accessibility and acceptability         | 2016                 | migrant women               | reproductive and maternal health | preventative health care                              | quantitative  | descriptive cross-sectional study | structured questionnaire                              | migrants                                       | 402      |
| Aung et al.        | accessibility and acceptability         | 2009                 | migrant workers             | general                          | access to health care in general                      | quantitative  | descriptive cross-sectional study | structured questionnaire                              | migrants                                       | 388      |
| Naing et al.       | accessibility                           | 2020                 | migrant workers             | general                          | access to health care in general and health insurance | quantitative  | descriptive cross-sectional study | survey                                                | migrants                                       | 240      |
| Isarabhakdi        | accessibility and acceptability         | 2004                 | migrant workers             | general                          | access to health care in general                      | mixed methods | mixed methods                     | survey and in-depth interviews and FGDs               | migrants and key informants (health providers) | 6656     |
| Seo                | acceptability                           | 2016                 | migrants                    | general                          | access to health care in general (timeliness)         | qualitative   | ethnographic                      | in-depth interviews and observation                   | migrants                                       | 23       |
| Toothong et al.    | availability, accessibility and contact | 2015                 | (irregular) migrant workers | infectious diseases              | preventative health care                              | mixed methods | mixed methods                     | structured questionnaire and key informant interviews | migrants and key informants (health personnel) | 767      |
| Harris             | accessibility                           | 2013                 | migrant workers             | general                          | access to health care in general                      | qualitative   | historical                        | document analysis and interviews                      | policy/health system                           | 120 KIIs |

| REFERENCE            | HEALTH COVERAGE DIMENSION                  | YEAR OF PUBLIC ATION | TYPE OF MIGRANT POPULATION | HEALTH DOMAIN                      | SCOPE OF HEALTH COVERAGE                                        | METHODS BROAD | STUDY DESIGN            | METHODS DETAILED                                           | PERSPECTIVE REPRESENTED                                                      | N                                                                                                                                                                                                                    |
|----------------------|--------------------------------------------|----------------------|----------------------------|------------------------------------|-----------------------------------------------------------------|---------------|-------------------------|------------------------------------------------------------|------------------------------------------------------------------------------|----------------------------------------------------------------------------------------------------------------------------------------------------------------------------------------------------------------------|
| Canavati et al.      | accessibility                              | 2011                 | migrant worker children    | immunization (Infectious diseases) | preventative health care                                        | qualitative   | descriptive qualitative | FGDs                                                       | migrants                                                                     | 53                                                                                                                                                                                                                   |
| Belton and Whittaker | availability and accessibility             | 2007                 | migrant worker women       | reproductive and maternal health   | access to specific health services and preventative health care | mixed methods | mixed methods           | health information system and FGDs and in-depth interviews | migrants and key informants (health personnel) and health information system | 232 patient records; 15 participant midwife group discussions ; semi-structured interviews and conversations: women inpatients with post-abortion complications (43), their male partners' (10), health workers (20) |
| Belton               | availability, accessibility, acceptability | 2007                 | refugee women and migrant  | reproductive and maternal health   | preventative health care and                                    | mixed methods | mixed methods           | health information system                                  | health information system,                                                   | 180 medical case notes,                                                                                                                                                                                              |

| REFERENCE      | HEALTH COVERAGE DIMENSION                        | YEAR OF PUBLIC ATION | TYPE OF MIGRANT POPULATION | HEALTH DOMAIN                    | SCOPE OF HEALTH COVERAGE                                        | METHODS BROAD | STUDY DESIGN    | METHODS DETAILED                                     | PERSPECTIVE REPRESENTED                        | N                                                                                                                                                                       |
|----------------|--------------------------------------------------|----------------------|----------------------------|----------------------------------|-----------------------------------------------------------------|---------------|-----------------|------------------------------------------------------|------------------------------------------------|-------------------------------------------------------------------------------------------------------------------------------------------------------------------------|
|                |                                                  |                      | worker women               |                                  | access to specific health services                              |               |                 | and semi-structured interviews and FGDs              | migrants and key informants (health personnel) | 31 referral records, 14 hospital case notes of deceased women, 43 in-depth interviews with women, 10 in-depth interviews with husbands, 20 interviews with lay midwives |
| Crozier et al. | accessibility and effective coverage             | 2008                 | migrant women              | HIV/AIDS (Infectious diseases)   | preventative health care                                        | qualitative   | grounded theory | in-depth interviews                                  | migrants                                       | 38 migrant pregnant women; 26 health personal                                                                                                                           |
| Hegde et al.   | availability and accessibility and acceptability | 2011                 | migrant worker women       | reproductive and maternal health | access to specific health services and preventative health care | mixed methods | mixed methods   | survey and in-depth interviews and document analysis | migrants                                       | 15 surveys and 10 in-depth interviews, 15 KIIs                                                                                                                          |

| REFERENCE         | HEALTH COVERAGE DIMENSION                          | YEAR OF PUBLIC ATION | TYPE OF MIGRANT POPULATION       | HEALTH DOMAIN                    | SCOPE OF HEALTH COVERAGE               | METHODS BROAD | STUDY DESIGN                | METHODS DETAILED                                                                | PERSPECTIVE REPRESENTED                                          | N                                                                                                                                                                                                                        |
|-------------------|----------------------------------------------------|----------------------|----------------------------------|----------------------------------|----------------------------------------|---------------|-----------------------------|---------------------------------------------------------------------------------|------------------------------------------------------------------|--------------------------------------------------------------------------------------------------------------------------------------------------------------------------------------------------------------------------|
| Hobstetter et al. | availability, accessibility and effective coverage | 2015                 | migrant women and refugee women  | reproductive and maternal health | access to specific health services     | qualitative   | descriptive qualitative     | document analysis and interviews and FGDs and others (service mapping exercise) | migrants and key informants (organizations and health personnel) | 46 key informant interviews with representatives from 25 organizations, 18 focus group discussions with migrant adults, migrant adolescents, and healthcare workers, and a service mapping exercise with 22 stakeholders |
| Holumyong et al.  | acceptability                                      | 2018                 | migrant worker women and migrant | reproductive and maternal health | access to specific health services and | quantitative  | descriptive cross-sectional | survey                                                                          | migrants                                                         | 987                                                                                                                                                                                                                      |

| REFERENCE                             | HEALTH COVERAGE DIMENSION           | YEAR OF PUBLIC ATION | TYPE OF MIGRANT POPULATION   | HEALTH DOMAIN                                   | SCOPE OF HEALTH COVERAGE                                   | METHODS BROAD | STUDY DESIGN                | METHODS DETAILED          | PERSPECTIVE REPRESENTED                                 | N                               |
|---------------------------------------|-------------------------------------|----------------------|------------------------------|-------------------------------------------------|------------------------------------------------------------|---------------|-----------------------------|---------------------------|---------------------------------------------------------|---------------------------------|
|                                       |                                     |                      | worker children              |                                                 | preventative health care                                   |               |                             |                           |                                                         |                                 |
| Hu                                    | accessibility and contact coverage  | 2010                 | refugees and migrant workers | general                                         | access to health care in general & health insurance        | quantitative  | secondary data analysis     | health information system | health information system                               | ?                               |
| Kågesten et al.                       | availability and accessibility      | 2017                 | refugee children             | reproductive and maternal health                | preventative health care & health promotion or information | quantitative  | descriptive cross-sectional | survey                    | migrants                                                | 399                             |
| Kaji et al.                           | availability and effective coverage | 2015                 | refugees and migrant workers | TB (Infectious diseases)                        | access to specific health services                         | qualitative   | descriptive qualitative     | in-depth interviews       | key informants (health personnel, health policy makers) | 31                              |
| Khongthana chayopit and Laohasiriwong | accessibility                       | 2017                 | migrant workers              | general                                         | access to health care in general                           | quantitative  | descriptive cross-sectional | structured questionnaire  | migrants                                                | 621                             |
| Kunstadter                            | accessibility and acceptability     | 2013                 | migrants                     | HIV/AIDS (Infectious diseases)                  | health care in general                                     | quantitative  | analytical cross-sectional  | survey                    | migrants                                                | 1169                            |
| Leiter et al.                         | accessibility                       | 2006                 | migrant worker women         | HIV/AIDS (Infectious diseases) and occupational | access to specific health services                         | qualitative   | phenomenological            | interviews                | migrants and key informants                             | 68 key informant interviews, 34 |



| REFERENCE             | HEALTH COVERAGE DIMENSION                         | YEAR OF PUBLICATION | TYPE OF MIGRANT POPULATION | HEALTH DOMAIN                    | SCOPE OF HEALTH COVERAGE                                  | METHODS BROAD | STUDY DESIGN                | METHODS DETAILED                                         | PERSPECTIVE REPRESENTED                                           | N                                                                |
|-----------------------|---------------------------------------------------|---------------------|----------------------------|----------------------------------|-----------------------------------------------------------|---------------|-----------------------------|----------------------------------------------------------|-------------------------------------------------------------------|------------------------------------------------------------------|
|                       |                                                   |                     |                            | health and RMNCH                 | and preventative health care                              |               |                             |                                                          |                                                                   | individual narratives                                            |
| Maybin                | availability and accessibility                    | 1992                | refugees                   | general                          | access to health care in general                          | mixed methods | mixed methods               | health information system and observation and interviews | health information system, key informants (researchers), migrants | ?                                                                |
| Murray et al.         | accessibility and acceptability                   | 2016                | migrants                   | HIV/AIDS (Infectious diseases)   | access to specific health services                        | qualitative   | ethnographic and case study | observation and semi-structured interviews               | migrants and key informants (health personnel)                    | 16 interviews with patients, 7 KIIs                              |
| Musumari and Chamchan | accessibility and acceptability                   | 2016                | migrant workers            | HIV/AIDS (Infectious diseases)   | preventative health care                                  | quantitative  | descriptive cross-sectional | survey                                                   | migrants                                                          | 1034                                                             |
| Naing et al.          | accessibility, acceptability and contact coverage | 2012                | migrant workers            | TB (Infectious diseases)         | access to specific health services                        | quantitative  | descriptive cross-sectional | survey                                                   | migrants                                                          | 614                                                              |
| Phanwichatkul et al.  | acceptability                                     | 2018                | migrant women              | reproductive and maternal health | access to specific health services (and health workforce) | qualitative   | ethnographic                | interviews and observation                               | migrants, key informants (including researchers)                  | 4 Burmese interpreters, 9 health professionals, 10 Burmese women |

| REFERENCE      | HEALTH COVERAGE DIMENSION                     | YEAR OF PUBLICATION | TYPE OF MIGRANT POPULATION                 | HEALTH DOMAIN       | SCOPE OF HEALTH COVERAGE                                        | METHODS BROAD | STUDY DESIGN                | METHODS DETAILED                                          | PERSPECTIVE REPRESENTED                        | N                                |
|----------------|-----------------------------------------------|---------------------|--------------------------------------------|---------------------|-----------------------------------------------------------------|---------------|-----------------------------|-----------------------------------------------------------|------------------------------------------------|----------------------------------|
| Pocock et al.  | acceptability                                 | 2020                | migrant workers and refugees               | general             | access to health care in general                                | qualitative   | descriptive qualitative     | in-depth interviews and document analysis                 | policy/health system                           | 44 Malaysia, 50 Thailand         |
| Pocock et al.  | availability or accessibility                 | 2016                | victims of trafficking                     | occupational health | preventative health care and access to specific health services | quantitative  | descriptive cross-sectional | survey                                                    | migrants                                       | 446                              |
| Pocock et al.  | availability, accessibility and acceptability | 2018                | migrant workers and victims of trafficking | general             | access to health care in general                                | mixed methods | mixed methods               | survey and interviews                                     | migrants and key informants                    | 275 fishermen, 20 key informants |
| Pudpong et al. | accessibility                                 | 2019                | (irregular) migrants                       | general             | health insurance                                                | qualitative   | case study                  | interviews and FGDs and observation and document analysis | migrants and key informants (stakeholders)     | 20 interviews and 5 FGDs         |
| Sirilak et al. | availability and acceptability                | 2013                | migrant workers                            | general             | healthcare in general (primary, health workforce)               | mixed methods | mixed methods               | in-depth interviews and observation and questionnaire     | migrants and key informants (health personnel) | 260 volunteers, 446 migrants     |

| REFERENCE                 | HEALTH COVERAGE DIMENSION                        | YEAR OF PUBLICATION | TYPE OF MIGRANT POPULATION             | HEALTH DOMAIN                    | SCOPE OF HEALTH COVERAGE                             | METHODS BROAD | STUDY DESIGN             | METHODS DETAILED                                   | PERSPECTIVE REPRESENTED                                            | N                                                                                   |
|---------------------------|--------------------------------------------------|---------------------|----------------------------------------|----------------------------------|------------------------------------------------------|---------------|--------------------------|----------------------------------------------------|--------------------------------------------------------------------|-------------------------------------------------------------------------------------|
| Srikanok et al.           | availability, accessibility and contact coverage | 2017                | refugees                               | reproductive and maternal health | preventative health care                             | quantitative  | longitudinal descriptive | health information system                          | health information system                                          | not applicable                                                                      |
| Sunpuwan et al.           | accessibility and acceptability                  | 2019                | migrants and migrant workers           | general                          | access to health care in general (drugs, timeliness) | qualitative   | descriptive qualitative  | in-depth interviews and FGDs and document analysis | migrants and key informants (drug suppliers and community members) | 18 drug suppliers, 16 community members, 6 FGDs, inventories from 17 drug suppliers |
| Suphanchai mat et al. (b) | accessibility and acceptability                  | 2019                | irregular migrants and migrant workers | general                          | access to health care in general                     | qualitative   | descriptive qualitative  | in-depth interviews and legal document analysis    | policy/health system                                               | ?                                                                                   |
| Suphanchai mat et al.     | accessibility                                    | 2017                | irregular migrants and migrant workers | general                          | access to health care in general                     | qualitative   | descriptive qualitative  | document analysis and in-depth interviews          | policy/health system                                               | 7                                                                                   |
| Thetkathuek et al.        | accessibility and contact coverage               | 2017                | migrant workers                        | general                          | access to health care in general                     | mixed methods | mixed methods            | survey and FGDs                                    | migrants                                                           | 861 participants in interviews /FGDs                                                |
| Tousaw et al.             | accessibility and acceptability                  | 2017                | migrant women                          | reproductive and maternal health | access to specific                                   | qualitative   | phenomenological         | in-depth interviews                                | migrants                                                           | 22                                                                                  |

| REFERENCE             | HEALTH COVERAGE DIMENSION           | YEAR OF PUBLICATION | TYPE OF MIGRANT POPULATION | HEALTH DOMAIN                    | SCOPE OF HEALTH COVERAGE               | METHODS BROAD | STUDY DESIGN            | METHODS DETAILED               | PERSPECTIVE REPRESENTED                        | N                                                                                                   |
|-----------------------|-------------------------------------|---------------------|----------------------------|----------------------------------|----------------------------------------|---------------|-------------------------|--------------------------------|------------------------------------------------|-----------------------------------------------------------------------------------------------------|
|                       |                                     |                     |                            |                                  | health services                        |               |                         |                                |                                                |                                                                                                     |
| Tschirhart et al.     | accessibility and acceptability     | 2020                | migrant women              | reproductive and maternal health | access to specific health services     | qualitative   | descriptive qualitative | FGDs                           | migrants                                       | 72                                                                                                  |
| Tschirhart et al. (a) | accessibility                       | 2016                | migrants and refugees      | TB (Infectious diseases)         | access to specific health services     | qualitative   | descriptive qualitative | interviews and FGDs            | migrants and key informants (health personnel) | 12 KIIs with public health officials and TB treatment providers; 11 FGDs with migrants and refugees |
| Tschirhart et al. (a) | accessibility                       | 2017                | migrants                   | TB (Infectious diseases)         | access to specific health services     | mixed methods | mixed methods           | FGDs and interviews and survey | migrants and key informants                    | 11 FGDs, 13 KIIs, 101 volunteers (survey)                                                           |
| Tschirhart et al. (b) | availability, accessibility         | 2016                | migrants and refugees      | TB (Infectious diseases)         | access to specific health services     | qualitative   | phenomenological        | FGDs                           | migrants                                       | 61                                                                                                  |
| Tschirhart et al. (b) | availability and effective coverage | 2017                | migrants                   | TB (Infectious diseases)         | access to specific health services and | qualitative   | descriptive qualitative | FGDs and interviews            | key informants                                 | 13                                                                                                  |

| REFERENCE              | HEALTH COVERAGE DIMENSION                        | YEAR OF PUBLICATION | TYPE OF MIGRANT POPULATION               | HEALTH DOMAIN                    | SCOPE OF HEALTH COVERAGE                                      | METHODS BROAD | STUDY DESIGN                | METHODS DETAILED | PERSPECTIVE REPRESENTED     | N                                    |
|------------------------|--------------------------------------------------|---------------------|------------------------------------------|----------------------------------|---------------------------------------------------------------|---------------|-----------------------------|------------------|-----------------------------|--------------------------------------|
|                        |                                                  |                     |                                          |                                  | inclusion in health information systems                       |               |                             |                  |                             |                                      |
| Tuangratana non et al. | availability and acceptability                   | 2019                | migrant children                         | general                          | health promotion or information                               | qualitative   | case study                  | interviews       | key informants              | 34                                   |
| Wangroongsarb et al.   | accessibility and contact coverage               | 2011                | (irregular) migrants and migrant workers | malaria (Infectious diseases)    | access to health care in general                              | quantitative  | analytical cross-sectional  | survey           | migrants                    | 1800 (900 Myanmar, 900 Cambodia n)   |
| Webber et al.          | availability and accessibility and acceptability | 2012                | migrant worker women                     | reproductive and maternal health | access to specific health services and preventive health care | mixed methods | mixed methods               | FGDs & survey    | migrants and key informants | 18 beer promoter FGDs, 55 KII/groups |
| Webber et al.          | accessibility and acceptability                  | 2015                | migrant worker women                     | reproductive and maternal health | access to specific health services and preventive health care | quantitative  | descriptive cross-sectional | survey           | migrants                    | 390 beer promoters                   |

| REFERENCE           | HEALTH COVERAGE DIMENSION                            | YEAR OF PUBLICATION | TYPE OF MIGRANT POPULATION | HEALTH DOMAIN            | SCOPE OF HEALTH COVERAGE                                     | METHODS BROAD | STUDY DESIGN                | METHODS DETAILED                                                                         | PERSPECTIVE REPRESENTED                        | N                                                                        |
|---------------------|------------------------------------------------------|---------------------|----------------------------|--------------------------|--------------------------------------------------------------|---------------|-----------------------------|------------------------------------------------------------------------------------------|------------------------------------------------|--------------------------------------------------------------------------|
| Wongkongdech et al. | accessibility and acceptability                      | 2015                | migrant workers            | TB (Infectious diseases) | access to specific health services & health insurance        | quantitative  | descriptive cross-sectional | structured questionnaire                                                                 | migrants                                       | 4874                                                                     |
| Titiporn et al.     | availability and accessibility                       | 2019                | migrant children           | general                  | health promotion or information and specific health services | quantitative  | analytical cross-sectional  | survey                                                                                   | migrants                                       | 375                                                                      |
| Bodeker and Neumann | availability and acceptability                       | 2012                | refugees                   | general                  | access to specific health services                           | mixed methods | mixed methods               | survey and in-depth interviews and FGDs and observation and document analysis and others | migrants and key informants (health personnel) | 59 refugee and migrant surveys, 4 in-depth interviews with practitioners |
| Mon and Xenos       | accessibility and acceptability and contact coverage | 2015                | migrant workers            | general                  | health insurance                                             | mixed methods | mixed methods               | structured questionnaire and in-depth interviews and observation                         | migrants                                       | ?                                                                        |

| REFERENCE            | HEALTH COVERAGE DIMENSION                             | YEAR OF PUBLICATION | TYPE OF MIGRANT POPULATION      | HEALTH DOMAIN                      | SCOPE OF HEALTH COVERAGE                                                               | METHODS BROAD | STUDY DESIGN                | METHODS DETAILED                        | PERSPECTIVE REPRESENTED                        | N                                        |
|----------------------|-------------------------------------------------------|---------------------|---------------------------------|------------------------------------|----------------------------------------------------------------------------------------|---------------|-----------------------------|-----------------------------------------|------------------------------------------------|------------------------------------------|
| Gedeon et al.        | availability and accessibility and acceptability      | 2016                | migrant women and refugee women | reproductive and maternal health   | access to specific health services                                                     | qualitative   | phenomenological            | interviews                              | migrants                                       | 31                                       |
| Phanwichatkul et al. | acceptability                                         | 2016                | migrant women                   | reproductive and maternal health   | access to specific health services (and health workforce) and preventative health care | qualitative   | ethnographic                | ethnographic interviews and observation | migrants and key informants (health personnel) | 4 health professionals; 10 Burmese women |
| Boonchutima et al.   | accessibility                                         | 2017                | migrants                        | HIV/AIDS (Infectious diseases)     | health promotion or information                                                        | quantitative  | descriptive cross-sectional | questionnaire                           | migrants and key informants                    | 106 PH officers                          |
| Nwi et al.           | acceptability                                         | 2018                | migrant workers                 | general                            | access to health care in general (and timeliness)                                      | quantitative  | descriptive cross-sectional | questionnaire                           | migrants                                       | 181                                      |
| Srithongtham et al.  | availability and acceptability and effective coverage | 2013                | migrant workers                 | general                            | access to health care in general                                                       | mixed methods | mixed methods               | FGDs and survey                         | policy/health system                           | 2 FGDs/province                          |
| Pinna et al.         | availability and acceptability and contact coverage   | 2020                | migrant children                | immunization (Infectious diseases) | preventative health care                                                               | mixed methods | mixed methods               | health information system and FGDs      | key informants (health personnel)              | 1707                                     |

| REFERENCE              | HEALTH COVERAGE DIMENSION                        | YEAR OF PUBLIC ATION | TYPE OF MIGRANT POPULATION  | HEALTH DOMAIN                    | SCOPE OF HEALTH COVERAGE                              | METHODS BROAD | STUDY DESIGN                | METHODS DETAILED               | PERSPECTIVE REPRESENTED                        | N                                                             |
|------------------------|--------------------------------------------------|----------------------|-----------------------------|----------------------------------|-------------------------------------------------------|---------------|-----------------------------|--------------------------------|------------------------------------------------|---------------------------------------------------------------|
| Xu et al.              | accessibility and acceptability                  | 2019                 | migrants                    | NCDs                             | preventative health care                              | mixed methods | mixed methods               | survey and interviews and FGDs | migrants and key informants (health personnel) | 166 KAP survey, 9 in-depth-interviews, 3 FGDs                 |
| Kongvattana non et al. | accessibility and acceptability                  | 2020                 | migrant worker women        | reproductive and maternal health | access to health care in general                      | quantitative  | descriptive cross-sectional | structured questionnaire       | migrants                                       | 180                                                           |
| Kunpeuk et al.         | accessibility                                    | 2020                 | (irregular) migrant workers | general                          | health insurance                                      | qualitative   | descriptive qualitative     | others: group model building   | key informants (stakeholders)                  | 20                                                            |
| Boonchutima et al.     | accessibility and acceptability                  | 2020                 | migrant workers             | HIV/AIDS (Infectious diseases)   | health promotion or information                       | quantitative  | descriptive cross-sectional | structured questionnaire       | migrants                                       | 386                                                           |
| Phaiyaron et al.       | accessibility and contact coverage               | 2020                 | (irregular) migrants        | general                          | access to health care in general and health insurance | quantitative  | secondary data analysis     | health information system      | health information system                      | 74.722                                                        |
| Kamonroek et al.       | accessibility and contact coverage               | 2020                 | migrant workers             | general                          | access to health care in general                      | quantitative  | descriptive cross-sectional | survey                         | migrants                                       | 72                                                            |
| Kusakabe and Pearson   | availability and accessibility and acceptability | 2016                 | migrant worker women        | general                          | access to health care in general                      | mixed methods | mixed methods               | in-depth interviews and survey | migrants                                       | 165 in-depth interviews, 504 surveys, 20 follow-up interviews |



| REFERENCE        | HEALTH COVERAGE DIMENSION                                               | YEAR OF PUBLICATION | TYPE OF MIGRANT POPULATION             | HEALTH DOMAIN                                      | SCOPE OF HEALTH COVERAGE           | METHODS BROAD | STUDY DESIGN            | METHODS DETAILED                               | PERSPECTIVE REPRESENTED                        | N                                                 |
|------------------|-------------------------------------------------------------------------|---------------------|----------------------------------------|----------------------------------------------------|------------------------------------|---------------|-------------------------|------------------------------------------------|------------------------------------------------|---------------------------------------------------|
| Fellmeth et al.  | acceptability                                                           | 2018                | migrant worker women and refugee women | mental health and reproductive and maternal health | access to specific health services | qualitative   | phenomenological        | in-depth interviews                            | migrants                                       | 11                                                |
| Gonah et al.     | accessibility and acceptability                                         | 2016                | migrants                               | general                                            | access to health care in general   | qualitative   | descriptive qualitative | FGDs                                           | migrants                                       | 7 FGDs                                            |
| Rijken et al.    | acceptability                                                           | 2012                | refugee women and migrant worker women | reproductive and maternal health                   | preventative health care           | mixed methods | mixed methods           | survey and observation and interviews and FGDs | migrants and key informants (health personnel) | 644                                               |
| Morrison         | accessibility and acceptability                                         | 2000                | refugee women                          | reproductive and maternal health                   | preventative health care           | mixed methods | mixed methods           | interviews and FGDs and survey                 | migrants and key informants                    | 102 women, 10 KIs, 28 men FGDs, 21 FGDs with TBAs |
| Cohen and Asgary | acceptability                                                           | 2016                | refugees and migrants                  | mental health                                      | access to specific health services | qualitative   | descriptive qualitative | FGDs and key informant interview               | migrants and key informants                    | 10 FGDs                                           |
| Foster et al.    | availability and accessibility and acceptability and effective coverage | 2017                | migrant women and refugee women        | reproductive and maternal health                   | access to specific health services | quantitative  | secondary data analysis | health information systems                     | health information system                      | 918                                               |
| Gedeon et al.    | acceptability                                                           | 2015                | refugee women and migrant women        | reproductive and maternal health                   | preventative health care           | qualitative   | phenomenological        | in-depth interviews                            | migrants                                       | 31                                                |

| REFERENCE               | HEALTH COVERAGE DIMENSION            | YEAR OF PUBLICATION | TYPE OF MIGRANT POPULATION             | HEALTH DOMAIN                                | SCOPE OF HEALTH COVERAGE                              | METHODS BROAD | STUDY DESIGN                | METHODS DETAILED                                                   | PERSPECTIVE REPRESENTED     | N                         |
|-------------------------|--------------------------------------|---------------------|----------------------------------------|----------------------------------------------|-------------------------------------------------------|---------------|-----------------------------|--------------------------------------------------------------------|-----------------------------|---------------------------|
| Keller and Mongkolpue t | acceptability and effective coverage | 1988                | refugees                               | general                                      | access to health care in general (health workforce)   | quantitative  | descriptive cross-sectional | survey                                                             | migrants                    | 305                       |
| Seo                     | accessibility                        | 2016                | (irregular) migrant women              | reproductive and maternal health             | preventative health care                              | qualitative   | ethnographic                | observation and in-depth-interviews and health information systems | migrants and key informants | 12 + other key informants |
| Tousaw et al.           | accessibility and acceptability      | 2018                | migrant worker women and refugee women | reproductive and maternal health             | access to specific health services                    | qualitative   | phenomenological            | in-depth interviews                                                | migrants                    | 16                        |
| Legido-Quigley et al.   | availability and acceptability       | 2020                | refugees and asylum-seekers            | general                                      | access to health care in general                      | qualitative   | descriptive qualitative     | interviews                                                         | key informants              | 30                        |
| Suphanchai mat et al.   | accessibility                        | 2020                | urban refugees/asylum-seekers          | general                                      | access to health care in general                      | quantitative  | analytical cross-sectional  | survey                                                             | migrants                    | 181                       |
| Srisai et al.           | accessibility and acceptability      | 2020                | migrant workers                        | general                                      | access to health care in general and health insurance | qualitative   | case study                  | in-depth interviews                                                | migrants and key informants | 14                        |
| Brzezinski et al.       | accessibility                        | 2019                | migrant workers                        | general and reproductive and maternal health | access to health care in general and                  | qualitative   | descriptive qualitative     | interviews                                                         | key informants and migrants | ?                         |

| REFERENCE                                | HEALTH COVERAGE DIMENSION          | YEAR OF PUBLICATION | TYPE OF MIGRANT POPULATION   | HEALTH DOMAIN                                                       | SCOPE OF HEALTH COVERAGE           | METHODS BROAD | STUDY DESIGN            | METHODS DETAILED                                                           | PERSPECTIVE REPRESENTED                        | N                                                                         |
|------------------------------------------|------------------------------------|---------------------|------------------------------|---------------------------------------------------------------------|------------------------------------|---------------|-------------------------|----------------------------------------------------------------------------|------------------------------------------------|---------------------------------------------------------------------------|
|                                          |                                    |                     |                              |                                                                     | preventative health care           |               |                         |                                                                            |                                                |                                                                           |
| Jitthai et al.                           | availability                       | 2010                | migrant workers              | HIV/AIDS (Infectious diseases)                                      | access to specific health services | quantitative  | secondary data analysis | document analysis and health information systems and survey and interviews | key informants                                 | not applicable                                                            |
| Maskhao et al.                           | accessibility and contact coverage | 2015                | migrant workers              | general                                                             | access to health care in general   | mixed methods | mixed methods           | interviews and observation and FGDs                                        | migrants and key informants                    | 30 FGDs, 6 KIIs                                                           |
| International Organization for Migration | accessibility and acceptability    | 2009                | migrant workers and refugees | general                                                             | access to health care in general   | mixed methods | mixed methods           | document analysis and interviews and FGDs                                  | migrants and key informants                    | not applicable                                                            |
| Chotiga                                  | accessibility and acceptability?   | 2010                | migrant women                | HIV/AIDS (Infectious diseases) and reproductive and maternal health | preventative health services       | qualitative   | grounded theory         | in-depth interviews and FGDs                                               | migrants and key informants (health personnel) | 38 Burmese pregnant women, 26 health care workers, 3 FGDs with HC workers |
